# Supplementary material
Source: PubMed Central journal article supplement (PMC4032175)
Supplement: NIHMS572011-supplement-Supp_DataS1.pdf [file NIHMS572011-supplement-Supp_DataS1.pdf]

This form must be completed by the corresponding author, signed by all authors and uploaded to Scholar One as a 'Supplementary file for review'. Answer all questions in full - check boxes to affirm, delete statements where appropriate and, if necessary, provide full details. The Editors reserve the right to reject papers that do not conform to the ethical policies of BJS.

Manuscript title: Natural orifice transluminal endoscopic surgery for emergency condition  
Authors: Juliane Bingener, MD and Irada Ibrahim Zada, MD in surgery  
Manuscript submission number: BJS-1362-Sep-13

---

### Funding

1. How was this research and its publication (or this publication if it is not research) funded? (*list all funders giving grant numbers where applicable*).

NIDDK K23 DK93553-01A1

---

### Role of the sponsor

2. The authors confirm that they had complete access to the study data supporting this publication.

---

### Conflicts of interest

3. Do any of the authors have financial interests in any company or institution that might benefit from this publication? (*e.g. employment, share ownership, patent rights, consultancy, research funding*).

YES  NO

If yes, please give full details:

- Share ownership
- Research funding >£5,000
- Fees for consultancy >£5,000
- Funding to attend/present at conferences >£5,000
- Any income equivalent to >5% of their gross annual income
- Income below the suggested threshold or received at an earlier time that might be considered relevant to the publication should also be declared below:

4. Do any of the authors have any other potential competing interests that readers or editors might consider relevant to this publication? (e.g. political or religious affiliations).  
If yes, please describe below:

YES  NO

**Authorship and Contributorship** (for details on BJS authorship policy, please visit the link in Section 3a of Instructions for Authors at [www.bjs.co.uk](http://www.bjs.co.uk).)

5. We declare that all listed authors have made substantial contributions to **all** of the following three parts of the manuscript:

- research design, or acquisition, analysis or interpretation of data;
- drafting the paper or revising it critically;
- approving the submitted version.

We also declare that no-one who qualifies for authorship has been excluded from the list of authors.

6. The Corresponding Author agrees to communicate with all other authors and will obtain their approval for the final version to be published.

**Role of Authors and Contributors**

7. Give a short description of each individual's contribution to the research and its publication (e.g. *designed study, analysed data, drafted paper*).

Designed review outline, literature review, drafted and reviewed manuscript - Juliane Bingener

Designed review outline, literature review, drafted and reviewed manuscript - Irada Ibrahim Zada

8. Was this research or its publication assisted by any non-financial or 'in-kind' contributions? (e.g. *provision of writing assistance, literature searching, data analysis, administrative support, supply of materials*).  
If yes, give details:

YES  NO

9. Written approval has been obtained from all individuals listed in the acknowledgements.

**Ownership**

10. I/we state that the submitted work is my/our own and that copyright has not been breached in seeking its publication.

11. Copies of permission letters for any material reproduced from other, copyrighted publications (e.g. tables or figures) have been obtained and sent to the Editorial Office by regular mail.

YES / NO /  
 NOT APPLICABLE

**Originality**

12. I/we declare that the submitted work has not previously been published in full and is not currently being considered for publication elsewhere.

X

13. I/we declare that re-publication of any data (e.g. a secondary analysis or translation) will not constitute redundant publication, will not breach copyright and will reference the original publication. In such cases a copy of the original paper has been sent to the Editorial Office for consideration with the current submission.

YES / NO /  
NOT APPLICABLE

**Registration of clinical trials**

14. For clinical trials state:

- Trial registration number .....
- Name of trial register .....

If none available, please provide an explanation:

N/A Review article

**Ethical framework**

15. This study was approved by the relevant bodies (e.g. institutional review boards, research ethics committees, national authorities).

YES / NO

Please give details below:

N/A

16. Appropriate consent was obtained from all research participants.

If no, please provide an explanation ('not applicable' is only acceptable for experimental studies):

YES / NO /  
NOT APPLICABLE

17. Consent for publication has been obtained from living individuals who might be identified from data or images included in this publication (or their families in the case of the deceased).

If no, please provide an explanation.

YES / NO /  
NOT APPLICABLE

**This document must be signed by all authors.**

By signing below I certify that the information provided above is correct and complete to the best of my knowledge and belief.

Juline Bingener, M.D.

Author 1 Print Name

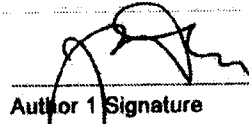  
Author 1 Signature

9-12-2013

Date

Irada Ibrahim Zada

Author 2 Print Name

  
Author 2 Signature

9/17/2013

Date

Author 3 Print Name

Author 3 Signature

Date

Author 4 Print Name

Author 4 Signature

Date

Author 5 Print Name

Author 5 Signature

Date

Author 6 Print Name

Author 6 Signature

Date

Author 7 Print Name

Author 7 Signature

Date

Author 8 Print Name

Author 8 Signature

Date

Author 9 Print Name

Author 9 Signature

Date

Author 10 Print Name

Author 10 Signature

Date

Space for additional information, if required:
